# Supplementary material for: Diet and PPARG2 Pro12Ala Polymorphism Interactions in Relation to Cancer Risk: A Systematic Review
Source: PubMed Central journal article supplement (PMC7831057; doi:10.3390/nu13010261), 2021-01-18
Supplement: nutrients-13-00261-s001.pdf [file nutrients-13-00261-s001.pdf]

## Supplementary materials

### Methods

#### *List of search terms:*

("Peroxisome proliferator-activated receptor"[All Fields] OR "Peroxisome proliferator activated receptor"[All Fields] OR "Peroxisome proliferator-activated receptors"[All Fields] OR "Peroxisome proliferator activated receptors"[All Fields] OR ("peroxisome proliferator-activated receptors"[MeSH Terms] OR ("peroxisome"[All Fields] AND "proliferator-activated"[All Fields] AND "receptors"[All Fields]) OR "peroxisome proliferator-activated receptors"[All Fields] OR "ppar"[All Fields])) AND (("neoplasms"[MeSH Terms] OR "neoplasms"[All Fields] OR "cancer"[All Fields]) OR (("carcinoma"[MeSH Terms] OR "carcinoma"[All Fields]) OR carcinoma'[All Fields] OR carcinoma"[All Fields] OR carcinoma's[All Fields] OR carcinoma,[All Fields] OR carcinoma26[All Fields] OR carcinomaa[All Fields] OR carcinomaand[All Fields] OR carcinomaarising[All Fields] OR carcinomaassociated[All Fields] OR carcinomaban[All Fields] OR carcinomabearing[All Fields] OR carcinomabol[All Fields] OR carcinomac[All Fields] OR carcinomacekwxwith[All Fields] OR carcinomacell[All Fields] OR carcinomacells[All Fields] OR carcinomacomparative[All Fields] OR carcinomadagger[All Fields] OR carcinomade[All Fields] OR carcinomaderived[All Fields] OR carcinomadeveloped[All Fields] OR carcinomadouble[All Fields] OR carcinomae[All Fields] OR carcinomaendometriale[All Fields] OR carcinomaepidermal[All Fields] OR carcinomagenesis[All Fields] OR carcinomahad[All Fields] OR carcinomahcc[All Fields] OR carcinomahep[All Fields] OR carcinomahnliche[All Fields] OR carcinomahoz[All Fields] OR carcinomai[All Fields] OR carcinomain[All Fields] OR carcinomainak[All Fields] OR carcinomais[All Fields] OR carcinomaja[All Fields] OR carcinomajaban[All Fields] OR carcinomajabol[All Fields] OR carcinomajanak[All Fields] OR carcinomak[All Fields] OR carcinomakban[All Fields] OR carcinomakrol[All Fields] OR carcinomal[All Fields] OR carcinomalarda[All Fields] OR carcinomalari[All Fields] OR carcinomalike[All Fields] OR carcinomametastasis[All Fields] OR carcinoman[All Fields] OR carcinomanak[All Fields] OR carcinomans[All Fields] OR carcinomaoesophageal[All Fields] OR carcinomaof[All Fields] OR carcinomaon[All Fields] OR carcinomaoral[All Fields] OR carcinomaosccand[All Fields] OR carcinomaoverview[All Fields] OR carcinomapatients[All Fields] OR carcinomaporo[All Fields] OR carcinomaprostatic[All Fields] OR carcinomara[All Fields] OR carcinomarol[All Fields] OR carcinomars[All Fields] OR ("carcinoma"[MeSH Terms] OR "carcinoma"[All Fields] OR "carcinomas"[All Fields]) OR carcinomas'[All Fields] OR carcinomas'is[All Fields] OR carcinomasa[All Fields] OR carcinomasand[All Fields] OR carcinomasarcoma[All Fields] OR carcinomasas[All Fields] OR carcinomasitu[All Fields] OR carcinomasl[All Fields] OR carcinomastenose[All Fields] OR carcinomastosis[All Fields] OR carcinomaswith[All Fields] OR carcinomasymptoms[All Fields] OR carcinomasyndrome[All Fields] OR carcinomat[All Fields] OR carcinomata[All Fields] OR carcinomatas[All Fields] OR carcinomatasis[All Fields] OR carcinomate[All Fields] OR carcinomateous[All Fields] OR carcinomateuse[All Fields] OR carcinomateuses[All Fields] OR carcinomateux[All Fields] OR carcinomateuze[All Fields] OR carcinomathrombus[All Fields] OR carcinomatic[All Fields] OR carcinomatis[All Fields] OR carcinomatissue[All Fields]

OR carcinomato[All Fields] OR carcinomatoasa[All Fields] OR carcinomatoase[All Fields] OR carcinomatodes[All Fields] OR carcinomatoese[All Fields] OR carcinomatoesen[All Fields] OR carcinomatoeser[All Fields] OR carcinomatoid[All Fields] OR carcinomatoides[All Fields] OR carcinomatoids[All Fields] OR carcinomatos[All Fields] OR carcinomatosa[All Fields] OR carcinomatosae[All Fields] OR carcinomatosas[All Fields] OR carcinomatosat[All Fields] OR carcinomatose[All Fields] OR carcinomatosem[All Fields] OR carcinomatosen[All Fields] OR carcinomatoser[All Fields] OR ("carcinoma"[MeSH Terms] OR "carcinoma"[All Fields] OR "carcinomatoses"[All Fields]) OR carcinomatosi[All Fields] OR carcinomatosis[All Fields] OR ("carcinoma"[MeSH Terms] OR "carcinoma"[All Fields] OR "carcinomatosis"[All Fields]) OR carcinomatosis'[All Fields] OR carcinomatosis"[All Fields] OR carcinomatosisapropos[All Fields] OR carcinomatosisist[All Fields] OR carcinomatoso[All Fields] OR carcinomatosos[All Fields] OR carcinomatosum[All Fields] OR carcinomatosus[All Fields] OR carcinomatous[All Fields] OR carcinomatousa[All Fields] OR carcinomatousis[All Fields] OR carcinomatously[All Fields] OR carcinomatoza[All Fields] OR carcinomatoze[All Fields] OR carcinomatozei[All Fields] OR carcinomatozis[All Fields] OR carcinomatrichoscopy[All Fields] OR carcinomatus[All Fields] OR carcinomatusum[All Fields] OR carcinomaval[All Fields] OR carcinomawas[All Fields] OR carcinomawere[All Fields] OR carcinomaxanti[All Fields])) AND ("humans"[MeSH Terms] AND English[lang])

**Table S1. Risk of Bias Assessment**

| <b>First author publication year</b>      | <b>Selection<sup>↑</sup></b> | <b>Comparability<sup>Δ</sup></b> | <b>Outcome<sup>&lt;</sup></b> | <b>Total</b> |
|-------------------------------------------|------------------------------|----------------------------------|-------------------------------|--------------|
| Petersen 2012 [27]                        | ****                         | **                               | ***                           | 9            |
| Kuriki 2006 [30]                          | ***                          | **                               | ***                           | 8            |
| Jiang 2005 [25]                           | ***                          | **                               | ***                           | 8            |
| Landi 2003 [26]                           | ****                         | **                               | **                            | 8            |
| Paltoo 2003 [28]                          | ****                         | **                               | **                            | 8            |
| Murtaugh 2005 [23] and Slattery 2005 [24] | ***                          | **                               | ***                           | 8            |
| Vogel 2007 [29]                           | ****                         | **                               | ***                           | 9            |
| Kim 2018 [31]                             | ***                          | **                               | ***                           | 9            |

<sup>↑</sup>A maximum of 5 stars could be awarded for this item.

<sup>Δ</sup> A maximum of 2 stars could be awarded for this item.

<sup><</sup>A maximum of 3 stars could be awarded for this item.

**Table S2. Interactions between *PPARG2* Pro12Ala allele polymorphism and energy, fat, or animal protein intakes in observational studies in relation to cancer risk**

| First author/<br>publication<br>year | Age<br>(mean or<br>range) | Women<br>(%)             | Study<br>location       | Cancer site          | Stratified categories | OR (95% CI)                                |                  | P-value for<br>Interaction |
|--------------------------------------|---------------------------|--------------------------|-------------------------|----------------------|-----------------------|--------------------------------------------|------------------|----------------------------|
|                                      |                           |                          |                         |                      |                       | <i>PPARG2</i> Pro12Ala allele polymorphism |                  |                            |
|                                      |                           |                          |                         |                      |                       | CC                                         | CG+GG            |                            |
| Slattery 2005<br>[24]                | 30-79                     | 45%                      | USA                     | Colon cancer         | Energy intake         | Reference                                  | 0.8 (0.6-1.1)    | 0.89                       |
|                                      |                           |                          |                         |                      | Low                   | 1.3 (1.0-1.5)                              | 1.1 (0.8-1.4)    |                            |
|                                      |                           |                          |                         |                      | Middle                | 1.6 (1.3-2.1)                              | 1.6 (1.1-2.2)    |                            |
| Slattery 2005<br>[24]                | 30-79                     | 42%                      | USA                     | Rectal cancer        | Energy intake         | Reference                                  | 1.2 (0.8-1.9)    | 0.17                       |
|                                      |                           |                          |                         |                      | Low                   | 1.0 (0.7-1.3)                              | 1.6 (1.1-2.4)    |                            |
|                                      |                           |                          |                         |                      | Middle                | 1.3 (0.9-1.8)                              | 1.2 (0.8-1.8)    |                            |
| Paltoo 2003 [28]                     | 60.5                      | 0%                       | Finland                 | Prostate<br>cancer   | Dietary fat           | NR                                         | NR               | >0.05                      |
| Kim 2018 [31]                        | 58.2                      | 44%                      | Korea                   | Colorectal<br>cancer | Red Meat intake       | Reference                                  | Reference        | 0.52                       |
|                                      |                           |                          |                         |                      | Low                   | 1.44 (1.00-2.08)                           | 0.48 (0.13-1.75) |                            |
|                                      |                           |                          |                         |                      | Low middle            | 1.21 (0.81-1.80)                           | 0.70 (0.17-2.94) |                            |
|                                      |                           |                          |                         |                      | High middle           | 1.47 (0.92-2.35)                           | 0.49 (0.11-2.22) |                            |
| Kuriki 2006 [30]                     | 57.9<br>(study 1)         | 48%<br>(study 1)         | Japan                   | Colorectal<br>cancer | Meat (study 1)        | Reference                                  | 0.56 (0.05-6.24) | 0.64                       |
|                                      |                           |                          |                         |                      | Low                   | 1.94 (1.06-3.58)                           | 0.93 (0.26-3.34) |                            |
|                                      | 58.9<br>(study 2)         | 37%<br>(study 2)         | High                    | 2.01 (0.91-4.45)     | 2.48 (0.27-<br>22.82) |                                            |                  |                            |
|                                      |                           |                          |                         |                      |                       |                                            |                  |                            |
|                                      |                           |                          | Milk (study 1)          |                      | Reference             | 1.47 (0.11-<br>19.47)                      | 0.08             |                            |
|                                      |                           |                          | Low                     | 0.61 (0.32-1.16)     | 1.08 (0.25-4.75)      |                                            |                  |                            |
|                                      |                           |                          | Middle                  | 0.63 (0.34-1.16)     | 0.08 (0.01-0.69)      |                                            |                  |                            |
|                                      |                           |                          | Beef and pork (study 2) |                      | Reference             | 0.32 (0.04-2.60)                           | 0.55             |                            |
|                                      |                           |                          | Low                     | 1.07 (0.75-1.53)     | 1.06 (0.37-3.00)      |                                            |                  |                            |
|                                      |                           |                          | Middle                  | 1.04 (0.69-1.58)     | 0.89 (0.24-3.32)      |                                            |                  |                            |
|                                      |                           | Processed meat (study 2) |                         |                      |                       |                                            |                  |                            |

|                       |       |     |     |              |                      |                  |                  |      |
|-----------------------|-------|-----|-----|--------------|----------------------|------------------|------------------|------|
|                       |       |     |     |              | Low                  | Reference        | 0.65 (0.19-2.28) | 0.81 |
|                       |       |     |     |              | Middle               | 1.34 (0.96-1.88) | 1.36 (0.47-3.90) |      |
|                       |       |     |     |              | High                 | 1.09 (0.71-1.67) | 0.43 (0.05-3.51) |      |
|                       |       |     |     |              | Poultry (study 2)    |                  |                  |      |
|                       |       |     |     |              | Low                  | Reference        | 0.29 (0.04-2.28) | 0.25 |
|                       |       |     |     |              | Middle               | 0.79 (0.57-1.09) | 0.88 (0.31-2.49) |      |
|                       |       |     |     |              | High                 | 0.78 (0.49-1.23) | 0.83 (0.22-3.07) |      |
|                       |       |     |     |              | Egg (study 2)        |                  |                  |      |
|                       |       |     |     |              | Low                  | Reference        | 0.41 (0.09-1.85) | 0.07 |
|                       |       |     |     |              | Middle               | 0.77 (0.55-1.08) | 0.15 (0.02-1.12) |      |
|                       |       |     |     |              | High                 | 0.75 (0.50-1.11) | 2.15 (0.64-7.22) |      |
|                       |       |     |     |              | Milk (study 2)       |                  |                  |      |
|                       |       |     |     |              | Low                  | Reference        | 1.31 (0.48-3.55) | 0.39 |
|                       |       |     |     |              | Middle               | 0.98 (0.69-1.40) | 0.22 (0.03-1.74) |      |
|                       |       |     |     |              | High                 | 0.67 (0.46-0.97) | 0.48 (0.10-2.23) |      |
|                       |       |     |     |              | Yoghurt (study 2)    |                  |                  |      |
|                       |       |     |     |              | Low                  | Reference        | 0.74 (0.28-2.00) | 0.70 |
|                       |       |     |     |              | Middle               | 1.40 (1.00-1.95) | 0.90 (0.19-4.31) |      |
|                       |       |     |     |              | High                 | 1.14 (0.73-1.77) | 1.45 (0.27-7.67) |      |
|                       |       |     |     |              | Mayonnaise (study 2) |                  |                  |      |
|                       |       |     |     |              | Low                  | Reference        | 0.47 (0.10-2.12) | 0.62 |
|                       |       |     |     |              | Middle               | 0.84 (0.59-1.18) | 1.02 (0.32-3.23) |      |
|                       |       |     |     |              | High                 | 1.12 (0.76-1.64) | 0.90 (0.24-3.34) |      |
| Murtaugh 2005<br>[23] | 30-79 | 45% | USA | Colon cancer | Total fat            |                  |                  |      |
|                       |       |     |     |              | Low                  | Reference        | 0.93 (0.71-1.22) | NR   |
|                       |       |     |     |              | Middle               | 1.18 (0.97-1.43) | 0.88 (0.66-1.17) |      |
|                       |       |     |     |              | High                 | 1.13 (0.87-1.48) | 1.09 (0.78-1.53) |      |
|                       |       |     |     |              | Saturated fat        |                  |                  |      |
|                       |       |     |     |              | Low                  | Reference        | 0.89 (0.67-1.17) | NR   |
|                       |       |     |     |              | Middle               | 1.01 (0.85-1.25) | 0.81 (0.61-1.08) |      |
|                       |       |     |     |              | High                 | 1.09 (0.84-1.41) | 1.01 (0.73-1.40) |      |
|                       |       |     |     |              | Monounsaturated fat  |                  |                  |      |
|                       |       |     |     |              | Low                  | Reference        | 0.91 (0.70-1.20) | NR   |
|                       |       |     |     |              | Middle               | 1.23 (1.01-1.50) | 0.90 (0.67-1.20) |      |
|                       |       |     |     |              | High                 | 1.02 (0.78-1.33) | 1.04 (0.74-1.46) |      |
|                       |       |     |     |              | Polyunsaturated fat  |                  |                  |      |
|                       |       |     |     |              | Low                  | Reference        | 0.83 (0.64-1.08) | NR   |
|                       |       |     |     |              | Middle               | 1.10 (0.91-1.32) | 1.11 (0.84-1.45) |      |
|                       |       |     |     |              | High                 | 1.13 (0.87-1.46) | 0.88 (0.62-1.25) |      |

|                       |       |     |     |               |                     |                  |                  |    |
|-----------------------|-------|-----|-----|---------------|---------------------|------------------|------------------|----|
|                       |       |     |     |               | Trans fat           |                  |                  |    |
|                       |       |     |     |               | Low                 | Reference        | 0.85 (0.63-1.12) | NR |
|                       |       |     |     |               | Middle              | 1.20 (0.99-1.47) | 0.88 (0.65-1.17) |    |
|                       |       |     |     |               | High                | 1.24 (0.98-1.56) | 1.31 (0.97-1.77) |    |
|                       |       |     |     |               | Cholesterol         |                  |                  |    |
|                       |       |     |     |               | Low                 | Reference        | 0.86 (0.65-1.14) | NR |
|                       |       |     |     |               | Middle              | 1.16 (0.95-1.42) | 0.97 (0.73-1.29) |    |
|                       |       |     |     |               | High                | 1.25 (0.99-1.59) | 1.17 (0.86-1.61) |    |
| Murtaugh 2005<br>[23] | 30-79 | 42% | USA | Rectal cancer | Total fat           |                  |                  |    |
|                       |       |     |     |               | Low                 | Reference        | 1.41 (0.89-2.25) | NR |
|                       |       |     |     |               | Middle              | 0.92 (0.68-1.24) | 1.24 (0.80-1.91) |    |
|                       |       |     |     |               | High                | 1.02 (0.72-1.45) | 1.03 (0.68-1.57) |    |
|                       |       |     |     |               | Saturated fat       |                  |                  |    |
|                       |       |     |     |               | Low                 | Reference        | 1.19 (0.79-1.84) | NR |
|                       |       |     |     |               | Middle              | 0.93 (0.70-1.24) | 1.16 (0.75-1.77) |    |
|                       |       |     |     |               | High                | 1.03 (0.72-1.46) | 1.17 (0.78-1.80) |    |
|                       |       |     |     |               | Monounsaturated fat |                  |                  |    |
|                       |       |     |     |               | Low                 | Reference        | 1.78 (1.10-2.88) | NR |
|                       |       |     |     |               | Middle              | 1.05 (0.80-1.42) | 1.04 (0.67-1.62) |    |
|                       |       |     |     |               | High                | 1.03 (0.72-1.47) | 1.14 (0.75-1.73) |    |
|                       |       |     |     |               | Polyunsaturated fat |                  |                  |    |
|                       |       |     |     |               | Low                 | Reference        | 1.31 (0.76-2.25) | NR |
|                       |       |     |     |               | Middle              | 0.98 (0.71-1.35) | 1.22 (0.77-1.93) |    |
|                       |       |     |     |               | High                | 0.87 (0.62-1.23) | 0.99 (0.66-1.48) |    |
|                       |       |     |     |               | Trans fat           |                  |                  |    |
|                       |       |     |     |               | Low                 | Reference        | 1.70 (1.11-2.59) | NR |
|                       |       |     |     |               | Middle              | 1.04 (0.79-1.38) | 1.03 (0.69-1.55) |    |
|                       |       |     |     |               | High                | 1.03 (0.73-1.44) | 1.10 (0.72-1.68) |    |
|                       |       |     |     |               | Cholesterol         |                  |                  |    |
|                       |       |     |     |               | Low                 | Reference        | 1.12 (0.72-1.75) | NR |
|                       |       |     |     |               | Middle              | 1.03 (0.76-1.38) | 1.66 (1.10-2.50) |    |
|                       |       |     |     |               | High                | 1.54 (1.12-2.12) | 1.52 (1.00-2.31) |    |

CC will be translated into proline and GG will be translated into alanine. NR: not reported
